# Supplementary material for: Seasonally dependent increases in subweekly temperature variability over Southern Hemisphere landmasses detected in multiple reanalyses
Source: Copernicus journal article supplement (doi:10.5194/wcd-5-1-2024), 2024-01-10
Supplement: Supplementary file 1 [file wcd-5-1-2024-supplement.pdf]

Supplement of Weather Clim. Dynam., 5, 1–15, 2024  
<https://doi.org/10.5194/wcd-5-1-2024-supplement>  
© Author(s) 2024. CC BY 4.0 License.

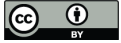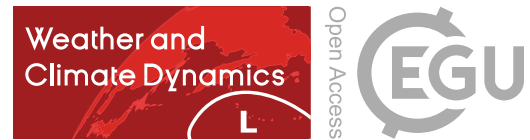

*Supplement of*

## **Seasonally dependent increases in subweekly temperature variability over Southern Hemisphere landmasses detected in multiple reanalyses**

**Patrick Martineau et al.**

*Correspondence to:* Patrick Martineau ([pmartineau@jamstec.go.jp](mailto:pmartineau@jamstec.go.jp))

The copyright of individual parts of the supplement might differ from the article licence.

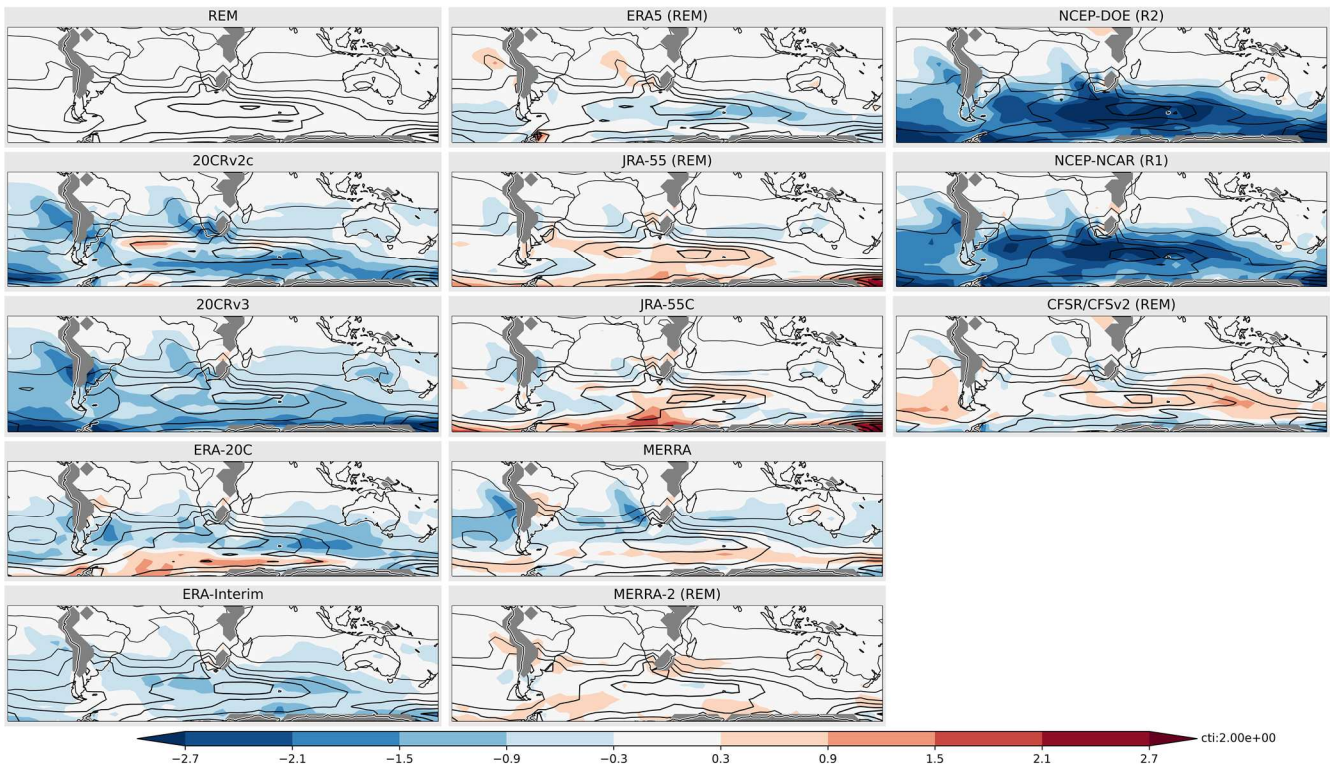

Figure S1: Same as Fig. 3 of the manuscript ( $T_{VAR}$ ) but for JJA.

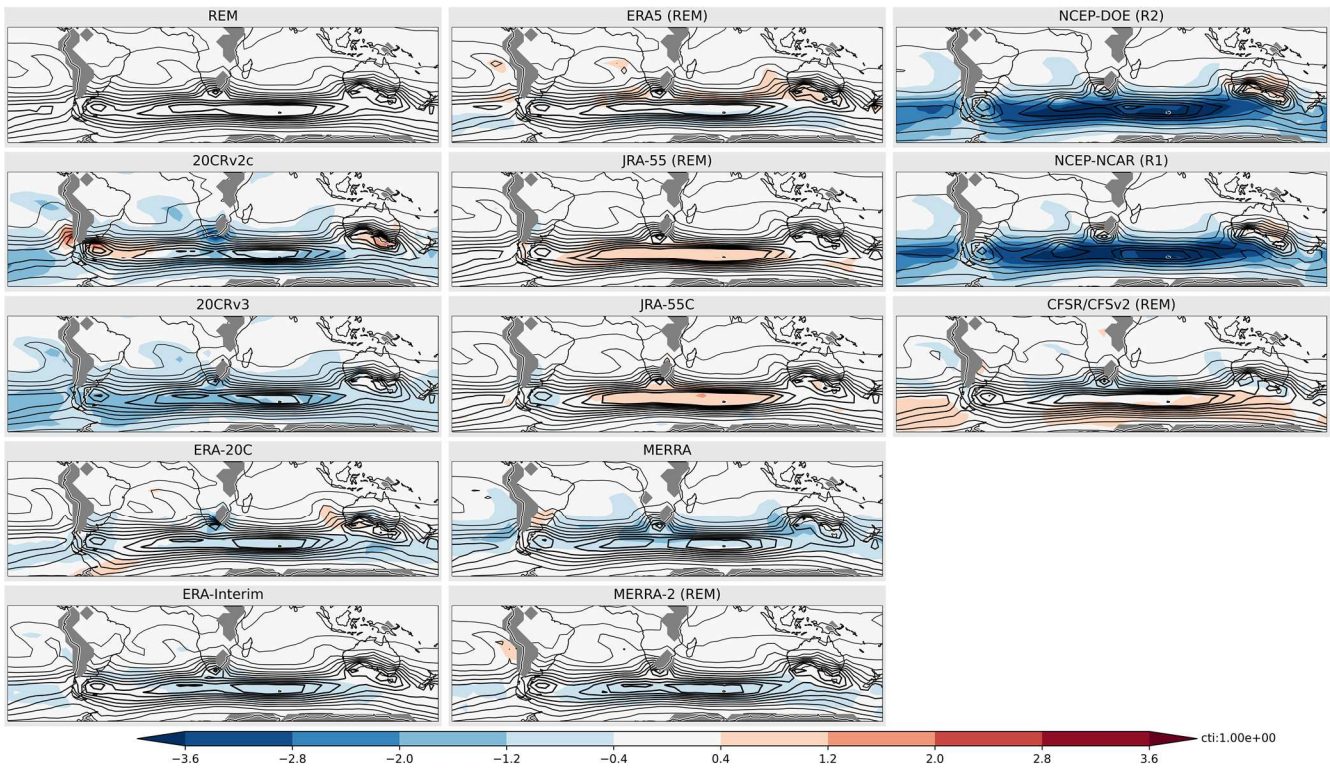

Figure S2: Same as Fig. 3 of the manuscript ( $T_{VAR}$ ) but for DJF.

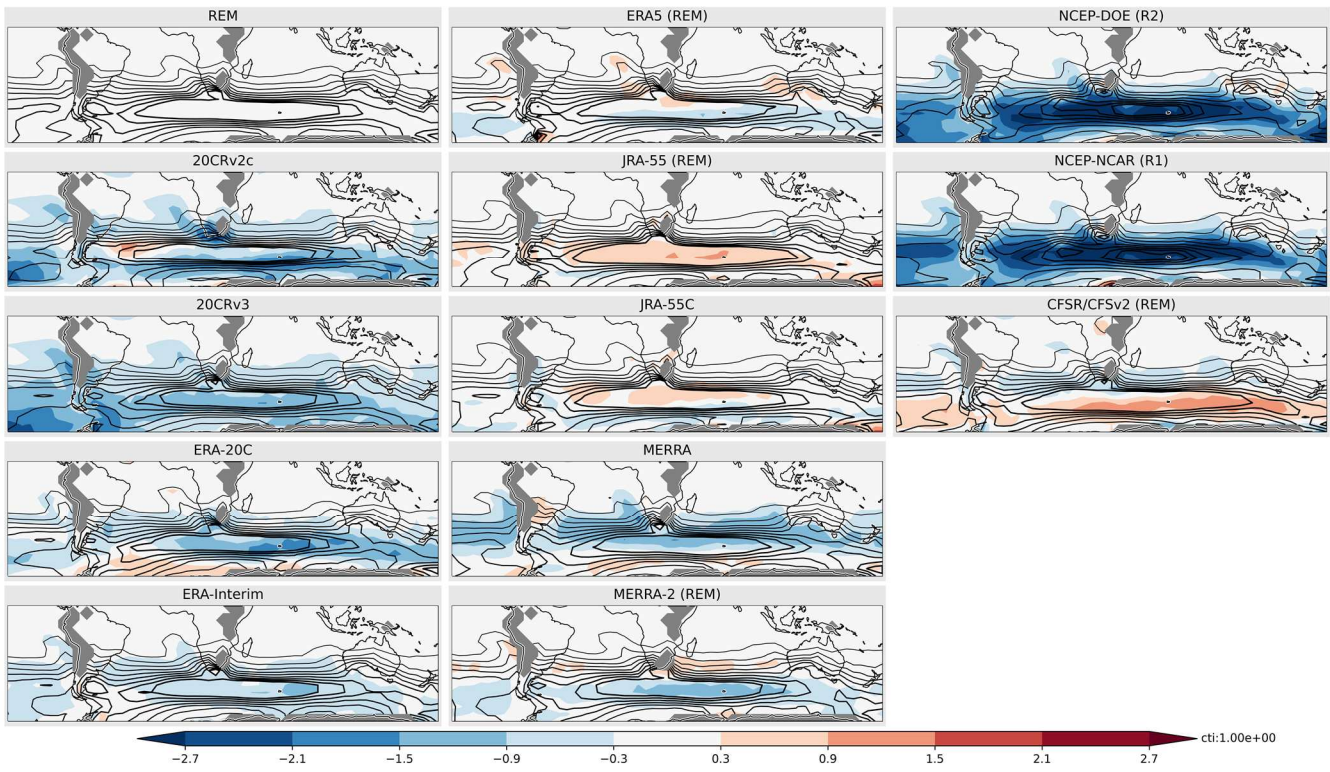

Figure S3: Same as Fig. 3 of the manuscript ( $T_{VAR}$ ) but for MAM.

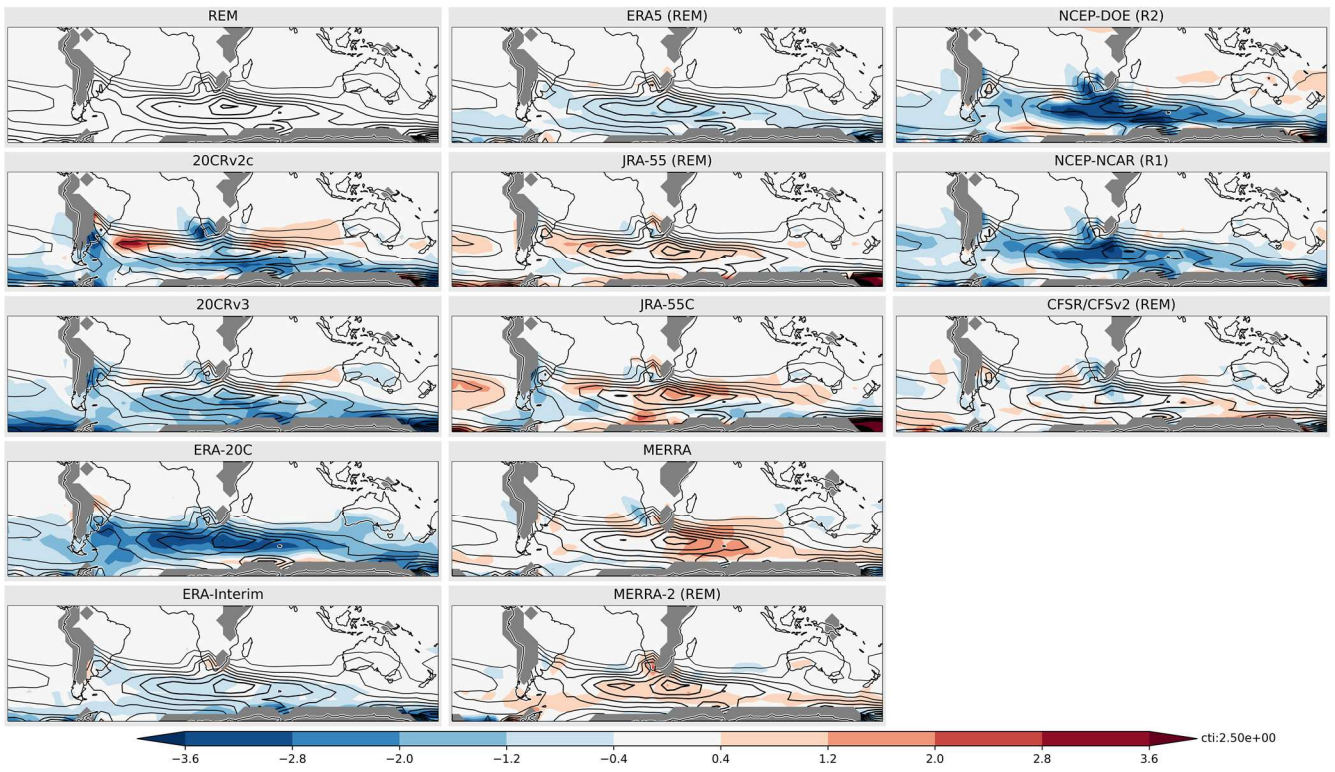

Figure S4: Same as Fig. 4 of the manuscript ( $F_{\text{horiz}}$ ) but for JJA.

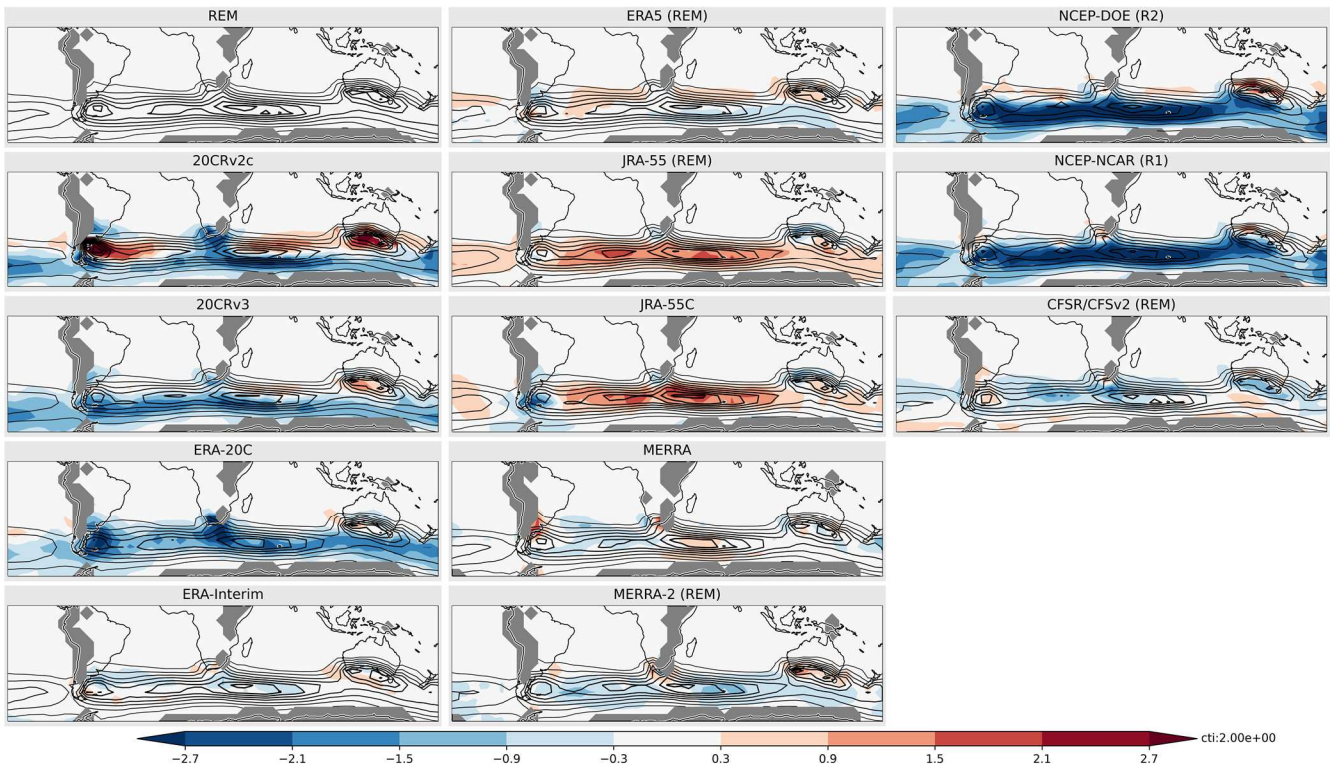

Figure S5: Same as Fig. 4 of the manuscript ( $F_{\text{horiz}}$ ) but for DJF.

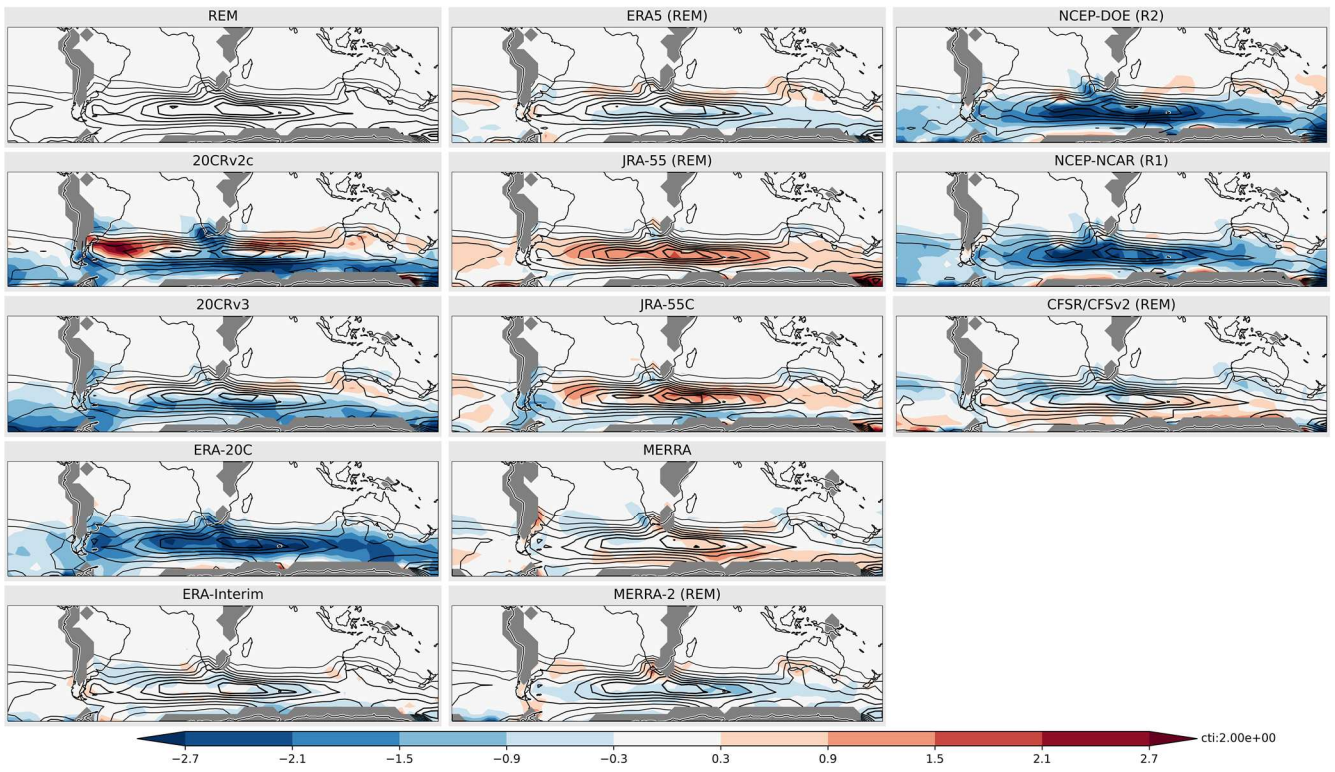

Figure S6: Same as Fig. 4 of the manuscript ( $F_{\text{horiz}}$ ) but for MAM.
